# Supplementary material
Source: ML conference proceedings conference paper supplement (https://openreview.net/forum?id=uFORMPcA_b)
Supplement: supplementary_material [file attachment]

## Sheet: Sheet1
dataset	lale_pipeline_cv_acc	lale_pipeline_test_acc	lale_pipeline_completed_trials	grammars_tpot_cv_acc	grammars_tpot_test_acc	grammars_tpot_completed_trials
hill-valley	1	1	150	0.954472	0.9525	35
phoneme	0.905801	0.902466	238	0.880387	0.871076	59
car	0.98961	0.996497	142	0.976675	0.971979	61
sylvine	0.945237	0.952691	151	0.921051	0.927853	32
blood-transfusion-service-center	0.792376	0.789474	339	0.796356	0.773279	75
credit-g	0.777629	0.739394	219	0.747778	0.754545	57
diabetes	0.78993	0.767717	345	0.774319	0.76378	83
kc1	0.881104	0.836207	216	0.87404	0.83477	78
shuttle	0.999563	0.999373	40	0.999022	0.998955	17
kr-vs-kp	0.993927	0.996209	57	0.993461	0.997156	18
mfeat-factors	0.972481	0.980303	51	0.965718	0.974242	7
spectf	0.90148	0.87069	425	0.867345	0.836207	102
breast-cancer	0.780162	0.684211	485	0.759379	0.705263	93
Australian	0.887419	0.855263	174	0.872294	0.846491	45

## Sheet: Sheet2
dataset	lale_pipeline_cv_acc	lale_pipeline_test_acc	lale_pipeline_completed_trials	grammars_tpot_cv_acc	grammars_tpot_test_acc	grammars_tpot_completed_trials	grammar_alphad3m_cv_acc	grammar_alphad3m_test_acc	grammar_alphad3m_completed_trials
hill-valley	1	1	150	0.954472	0.9525	35	0.963068	0.97	374
phoneme	0.905801	0.902466	238	0.880387	0.871076	59	0.790884	0.765695	322
car	0.98961	0.996497	142	0.976675	0.971979	61	0.942176	0.926445	373
sylvine	0.945237	0.952691	151	0.921051	0.927853	32	0.91028	0.912478	288
blood-transfusion-service-center	0.792376	0.789474	339	0.796356	0.773279	75	0.788416	0.748988	374
credit-g	0.777629	0.739394	219	0.747778	0.754545	57	0.749293	0.751515	364
diabetes	0.78993	0.767717	345	0.774319	0.76378	83	0.770455	0.795276	373
kc1	0.881104	0.836207	216	0.87404	0.83477	78	0.870491	0.837644	373
shuttle	0.999563	0.999373	40	0.999022	0.998955	17	0.999048	0.998851	86
kr-vs-kp	0.993927	0.996209	57	0.993461	0.997156	18	0.971504	0.96872	366
mfeat-factors	0.972481	0.980303	51	0.965718	0.974242	7	0.973255	0.974242	218
spectf	0.90148	0.87069	425	0.867345	0.836207	102	0.845791	0.801724	302
breast-cancer	0.780162	0.684211	485	0.759379	0.705263	93	0.759379	0.694737	370
Australian	0.887419	0.855263	174	0.872294	0.846491	45	0.87234	0.859649	375
jungle_chess_2pcs_raw_endgame_complete							0.753164	0.749713	187

## Sheet: Sheet3
	CV_Accuracy	Test_Accuracy	Completed Trials	CV_Accuracy	Test_Accuracy	Completed Trials	CV_Accuracy	Test_Accuracy	Completed Trials	CV_Accuracy	Test_Accuracy	Completed Trials
dataset	lale_pipeline_cv_acc	lale_pipeline_test_acc	lale_pipeline_completed_trials	grammars_tpot_cv_acc	grammars_tpot_test_acc	grammars_tpot_completed_trials	grammar_alphad3m_cv_acc	grammar_alphad3m_test_acc	grammar_alphad3m_completed_trials	autosklearn_cv_acc	autosklearn_test_acc	autosklearn_completed_trials
breast-cancer	0.780162	0.684211	485	0.759379	0.705263	93	0.759379	0.694737	370	0.769634	0.715789	779
credit-g	0.777629	0.739394	219	0.747778	0.754545	57	0.749293	0.751515	364	0.759701	0.769697	350
diabetes	0.78993	0.767717	345	0.774319	0.76378	83	0.770455	0.795276	373	0.772374	0.783465	394
blood-transfusion-service-center	0.792376	0.789474	339	0.796356	0.773279	75	0.788416	0.748988	374	0.794411	0.736842	427
kc1	0.881104	0.836207	216	0.87404	0.83477	78	0.870491	0.837644	373	0.882519	0.83908	237
Australian	0.887419	0.855263	174	0.872294	0.846491	45	0.87234	0.859649	375	0.883117	0.846491	185
spectf	0.90148	0.87069	425	0.867345	0.836207	102	0.845791	0.801724	302	0.888412	0.87069	399
phoneme	0.905801	0.902466	238	0.880387	0.871076	59	0.790884	0.765695	322	0.904972	0.901345	151
sylvine	0.945237	0.952691	151	0.921051	0.927853	32	0.91028	0.912478	288	0.950189	0.952099	152
mfeat-factors	0.972481	0.980303	51	0.965718	0.974242	7	0.973255	0.974242	218	0.979851	0.987879	59
kr-vs-kp	0.993927	0.996209	57	0.993461	0.997156	18	0.971504	0.96872	366	0.993928	0.997156	239
car	0.98961	0.996497	142	0.976675	0.971979	61	0.942176	0.926445	373	0.993086	0.992995	328
shuttle	0.999563	0.999373	40	0.999022	0.998955	17	0.999048	0.998851	86	0.999768	0.78814	54
hill-valley	1	1	150	0.954472	0.9525	35	0.963068	0.97	374	0.972906	0.9675	303

## Sheet: Sheet5
dataset	lale_pipeline_1_cv_acc	lale_pipeline_1_test_acc	lale_pipeline_1_completed_trials	lale_pipeline_2_cv_acc	lale_pipeline_2_test_acc	lale_pipeline_2_completed_trials	lale_pipeline_3_cv_acc	lale_pipeline_3_test_acc	lale_pipeline_3_completed_trials	lale_pipeline_4_cv_acc	lale_pipeline_4_test_acc	lale_pipeline_4_completed_trials	lale_pipeline_5_cv_acc	lale_pipeline_5_test_acc	lale_pipeline_5_completed_trials	Avg Test_acc
car	0.983568	0.978984	105	0.981858	0.982487	100	0.97242	0.964974	87	0.990487	0.992995	148	0.990487	0.992995	148	0.982487
spectf	0.90148	0.862069	500	0.888437	0.87931	145	0.897225	0.887931	204	0.90148	0.862069	583	0.8716	0.87069	76	0.872414
Australian	0.887373	0.859649	485	0.885291	0.842105	307	0.881082	0.855263	283	0.885291	0.859649	546	0.889685	0.855263	455	0.854386
jungle_chess_2pcs_raw_endgame_complete	0.891734	0.902914	53	0.891734	0.902914	42	0.891734	0.902914	38	0.891734	0.902914	42	0.891734	0.902914	42	0.902914
kr-vs-kp	0.992524	0.992417	55	0.990657	0.993365	51	0.991125	0.994313	39	0.991125	0.993365	76	0.991125	0.993365	66	0.993365
phoneme	0.897238	0.884529	282	0.901657	0.898543	229	0.900829	0.89574	147	0.896133	0.890695	217	0.895304	0.883408	215	0.890583
sylvine	0.93912	0.953282	67	0.93912	0.953282	63	0.932422	0.939089	34	0.944361	0.952099	156	0.944073	0.952099	126	0.94997
blood-transfusion-service-center	0.800376	0.785425	495	0.796337	0.797571	126	0.790416	0.765182	305	0.796376	0.672065	543	0.798337	0.793522	506	0.762753
kc1	0.881818	0.829023	106	0.87828	0.846264	103	0.881112	0.833333	90	0.874741	0.837644	150	0.881112	0.827586	152	0.83477
diabetes	0.784066	0.748031	133	0.772378	0.783465	136	0.770531	0.779528	116	0.782163	0.783465	412	0.77826	0.779528	856	0.774803
hill-valley	1	1	78	1	1	79	0.985215	0.9725	55	0.996296	0.995	125	0.996296	0.995	126	0.9925
credit-g	0.755185	0.745455	81	0.764207	0.745455	82	0.746285	0.745455	80	0.773129	0.748485	255	0.78957	0.757576	365	0.748485
mfeat-factors	0.972481	0.980303	45	0.973953	0.974242	61	0.968759	0.972727	36	0.973972	0.975758	61	0.973933	0.975758	61	0.975758
breast-cancer	0.764372	0.705263	127	0.774899	0.715789	153	0.764507	0.726316	96	0.790553	0.715789	891	0.780027	0.694737	821	0.711579
shuttle	0.999331	0.999269	40	0.999434	0.999373	39	0.999537	0.99953	34	0.999434	0.999373	41	0.999331	0.999321	41	0.999373

## Sheet: Lale pipeline summary
dataset	lale_pipeline_1_cv_acc	lale_pipeline_1_test_acc	lale_pipeline_1_completed_trials	lale_pipeline_1_total_trials	lale_pipeline_2_cv_acc	lale_pipeline_2_test_acc	lale_pipeline_2_completed_trials	lale_pipeline_2_total_trials	lale_pipeline_3_cv_acc	lale_pipeline_3_test_acc	lale_pipeline_3_completed_trials	lale_pipeline_3_total_trials	lale_pipeline_4_cv_acc	lale_pipeline_4_test_acc	lale_pipeline_4_completed_trials	lale_pipeline_4_total_trials	lale_pipeline_5_cv_acc	lale_pipeline_5_test_acc	lale_pipeline_5_completed_trials	lale_pipeline_5_total_trials	average_test_acc	stdev_test_acc
Australian	0.887373	0.859649	485	500	0.885291	0.842105	307	317	0.881082	0.855263	283	294	0.885291	0.859649	546	564	0.889685	0.855263	455	469	0.854386	0.00720688
blood-transfusion-service-center	0.800376	0.785425	495	500	0.796337	0.797571	126	137	0.790416	0.765182	305	312	0.796376	0.672065	543	552	0.798337	0.793522	506	519	0.762753	0.0522095
breast-cancer	0.764372	0.705263	127	141	0.774899	0.715789	153	166	0.764507	0.726316	96	108	0.790553	0.715789	891	914	0.780027	0.694737	821	833	0.711579	0.0120018
car	0.983568	0.978984	105	124	0.981858	0.982487	100	117	0.97242	0.964974	87	99	0.990487	0.992995	148	158	0.990487	0.992995	148	158	0.982487	0.0116169
credit-g	0.755185	0.745455	81	96	0.764207	0.745455	82	95	0.746285	0.745455	80	90	0.773129	0.748485	255	265	0.78957	0.757576	365	380	0.748485	0.00524864
diabetes	0.784066	0.748031	133	144	0.772378	0.783465	136	146	0.770531	0.779528	116	126	0.782163	0.783465	412	422	0.77826	0.779528	856	872	0.774803	0.0150947
hill-valley	1	1	78	85	1	1	79	87	0.985215	0.9725	55	63	0.996296	0.995	125	130	0.996296	0.995	126	130	0.9925	0.0114564
jungle_chess_2pcs_raw_endgame_complete	0.891734	0.902914	53	62	0.891734	0.902914	42	50	0.891734	0.902914	38	46	0.891734	0.902914	42	50	0.891734	0.902914	42	50	0.902914	0
kc1	0.881818	0.829023	106	115	0.87828	0.846264	103	114	0.881112	0.833333	90	100	0.874741	0.837644	150	156	0.881112	0.827586	152	155	0.83477	0.00753455
kr-vs-kp	0.992524	0.992417	55	65	0.990657	0.993365	51	62	0.991125	0.994313	39	50	0.991125	0.993365	76	85	0.991125	0.993365	66	75	0.993365	0.000670243
mfeat-factors	0.972481	0.980303	45	61	0.973953	0.974242	61	74	0.968759	0.972727	36	50	0.973972	0.975758	61	74	0.973933	0.975758	61	74	0.975758	0.00283459
phoneme	0.897238	0.884529	282	287	0.901657	0.898543	229	234	0.900829	0.89574	147	154	0.896133	0.890695	217	223	0.895304	0.883408	215	221	0.890583	0.00667252
shuttle	0.999331	0.999269	40	50	0.999434	0.999373	39	50	0.999537	0.99953	34	45	0.999434	0.999373	41	50	0.999331	0.999321	41	50	0.999373	9.77444e-05
spectf	0.90148	0.862069	500	500	0.888437	0.87931	145	155	0.897225	0.887931	204	206	0.90148	0.862069	583	586	0.8716	0.87069	76	86	0.872414	0.01124
sylvine	0.93912	0.953282	67	73	0.93912	0.953282	63	68	0.932422	0.939089	34	40	0.944361	0.952099	156	157	0.944073	0.952099	126	129	0.94997	0.00611142

## Sheet: alphad3m summary
dataset	grammar_alphad3m_1_cv_acc	grammar_alphad3m_1_test_acc	grammar_alphad3m_1_completed_trials	grammar_alphad3m_1_total_trials	grammar_alphad3m_2_cv_acc	grammar_alphad3m_2_test_acc	grammar_alphad3m_2_completed_trials	grammar_alphad3m_2_total_trials	grammar_alphad3m_3_cv_acc	grammar_alphad3m_3_test_acc	grammar_alphad3m_3_completed_trials	grammar_alphad3m_3_total_trials	grammar_alphad3m_4_cv_acc	grammar_alphad3m_4_test_acc	grammar_alphad3m_4_completed_trials	grammar_alphad3m_4_total_trials	grammar_alphad3m_5_cv_acc	grammar_alphad3m_5_test_acc	grammar_alphad3m_5_completed_trials	grammar_alphad3m_5_total_trials	alphad3m_test_accuracy	alphad3m_stdev_acc
Australian	0.876503	0.868421	1224	1409	0.878631	0.868421	1029	1206	0.876503	0.868421	716	902	0.878631	0.868421	781	926	0.876503	0.868421	804	948	0.868421	0
blood-transfusion-service-center	0.788455	0.757085	1128	1346	0.788416	0.748988	1015	1184	0.790416	0.736842	786	931	0.788416	0.748988	747	888	0.788416	0.744939	797	927	0.747368	0.00735462
breast-cancer	0.769771	0.726316	1244	1428	0.769636	0.715789	1056	1220	0.764507	0.705263	818	960	0.764642	0.642105	822	962	0.769636	0.684211	822	957	0.694737	0.0332871
car	0.943027	0.935201	742	832	0.942153	0.921191	614	694	0.943855	0.926445	488	558	0.943885	0.921191	482	547	0.941287	0.931699	459	539	0.927145	0.00626569
credit-g	0.767226	0.745455	1193	1368	0.767226	0.748485	1007	1160	0.767203	0.754545	756	881	0.768707	0.745455	742	865	0.767215	0.745455	747	871	0.747879	0.00395103
diabetes	0.770436	0.775591	956	1255	0.772397	0.779528	903	1104	0.772397	0.779528	798	933	0.772397	0.779528	814	944	0.772397	0.779528	795	927	0.77874	0.00176068
hill-valley	0.964303	0.9675	893	1102	0.964303	0.97	786	912	0.963068	0.97	608	717	0.963068	0.9675	606	711	0.963068	0.965	608	705	0.968	0.00209165
jungle_chess_2pcs_raw_endgame_complete	0.755095	0.749983	211	257	0.75373	0.750862	206	258	0.753064	0.74978	157	202	0.701346	0.705294	282	333	0.75373	0.750862	177	228	0.741356	0.0201656
kc1	0.875443	0.83477	1227	1406	0.869787	0.83908	959	1108	0.871195	0.836207	771	905	0.870491	0.837644	752	880	0.874736	0.833333	772	888	0.836207	0.00227175
kr-vs-kp	0.975239	0.969668	796	1055	0.971504	0.96872	758	918	0.972443	0.96872	515	673	0.972439	0.96872	515	648	0.974777	0.965877	475	629	0.968341	0.00143751
mfeat-factors	0.974751	0.975758	350	440	0.974751	0.975758	251	319	0.974751	0.975758	214	270	0.973982	0.974242	217	265	0.973236	0.975758	224	273	0.975455	0.000677596
phoneme	0.790884	0.765695	939	1203	0.790884	0.765695	677	950	0.790884	0.765695	481	679	0.790884	0.765695	587	752	0.790884	0.765695	550	712	0.765695	0
shuttle	0.999125	0.998851	157	232	0.999125	0.998851	137	195	0.999125	0.998851	124	157	0.999048	0.998851	112	143	0.999125	0.998851	111	157	0.998851	0
spectf	0.858557	0.801724	994	1284	0.854117	0.913793	879	1126	0.849769	0.905172	692	869	0.858557	0.801724	689	855	0.854302	0.758621	677	854	0.836207	0.0692344
sylvine	0.912905	0.911886	490	610	0.91057	0.913661	530	717	0.91028	0.912478	421	564	0.910863	0.914843	357	443	0.91028	0.912478	414	532	0.913069	0.00118273

## Sheet: Sheet4
dataset	autosklearn_adaboost_cv_acc	autosklearn_adaboost_test_acc	autosklearn_adaboost_completed_trials	lale_adaboost_cv_acc	lale_adaboost_test_acc	lale_adaboost_completed_trials
kc1	0.876150	0.837644	309	0.881811	0.841954	498
kr-vs-kp	0.994395	0.992417	319	0.970569	0.965877	438
mfeat-factors	0.974627	0.980303	26	0.882199	0.877273	94
spectf	0.901288	0.87069	666	0.909991	0.905172	500
car	0.981850	0.978984	662	0.889427	0.828371	500
hill-valley	0.988916	0.9925	73	0.987669	0.9975	195
breast-cancer	0.769634	0.726316	936	0.769636	0.694737	496
blood-transfusion-service-center	0.806387	0.740891	914	0.816277	0.748988	499
phoneme	0.906077	0.913677	150	0.829006	0.815022	441
credit-g	0.765672	0.772727	398	0.780626	0.736364	499
sylvine	0.943781	0.952099	85	0.923095	0.929627	272
Australian	0.887446	0.850877	655	0.880944	0.846491	500
shuttle	0.999768	0.999634	53	0.999022	0.998955	82
diabetes	0.772374	0.740157	808	0.778222	0.783465	499

## Sheet: grammar_tpot_summary
dataset	grammar_tpot_1_cv_acc	grammar_tpot_1_test_acc	grammar_tpot_1_completed_trials	grammar_tpot_1_total_trials	grammar_tpot_2_cv_acc	grammar_tpot_2_test_acc	grammar_tpot_2_completed_trials	grammar_tpot_2_total_trials	grammar_tpot_3_cv_acc	grammar_tpot_3_test_acc	grammar_tpot_3_completed_trials	grammar_tpot_3_total_trials	grammar_tpot_4_cv_acc	grammar_tpot_4_test_acc	grammar_tpot_4_completed_trials	grammar_tpot_4_total_trials	grammar_tpot_5_cv_acc	grammar_tpot_5_test_acc	grammar_tpot_5_completed_trials	grammar_tpot_5_total_trials	tpot_average_test_acc	tpot_stdev_test_acc
Australian	0.88543	0.859649	469	500	0.885291	0.864035	146	161	0.885291	0.864035	146	161	0.880944	0.850877	144	158	0.883117	0.855263	182	199	0.858772	0.0057186
blood-transfusion-service-center	0.804297	0.809717	325	341	0.794376	0.777328	126	138	0.794376	0.777328	126	138	0.796297	0.740891	305	323	0.792416	0.769231	170	182	0.774899	0.0245599
breast-cancer	0.774899	0.715789	464	500	0.780162	0.715789	369	391	0.780162	0.715789	369	391	0.785425	0.726316	349	381	0.775034	0.694737	403	431	0.713684	0.011531
car	0.986139	0.989492	117	148	0.990487	0.991243	102	126	0.990487	0.991243	102	126	0.983598	0.991243	72	91	0.989625	0.992995	126	156	0.991243	0.00123837
credit-g	0.761233	0.745455	185	200	0.75376	0.736364	109	123	0.75376	0.736364	109	123	0.755319	0.748485	155	172	0.752289	0.739394	122	142	0.741212	0.00550482
diabetes	0.784085	0.755906	463	483	0.782105	0.775591	238	250	0.782105	0.775591	238	250	0.774358	0.759843	270	300	0.784066	0.751969	311	343	0.76378	0.0111355
hill-valley	0.99878	1	98	111	1	1	70	80	1	1	70	80	0.99878	1	72	81	1	1	69	79	1	0
jungle_chess_2pcs_raw_endgame_complete	0.861796	0.866608	41	55	0.881211	0.903996	37	47	0.881211	0.903996	37	47	0.881211	0.903996	38	47	0.858965	0.86654	35	46	0.889027	0.0204966
kc1	0.883939	0.840517	174	189	0.877573	0.831897	129	140	0.877573	0.831897	129	140	0.874744	0.829023	88	97	0.87545	0.840517	97	105	0.83477	0.00537594
kr-vs-kp	0.993927	0.994313	116	131	0.992993	0.994313	45	60	0.992993	0.994313	45	60	0.993927	0.994313	63	72	0.992526	0.994313	52	66	0.994313	1.24127e-16
mfeat-factors	0.968761	0.977273	48	64	0.962016	0.972727	17	26	0.962016	0.972727	17	26	0.962025	0.963636	18	28	0.962016	0.972727	17	26	0.971818	0.0049793
phoneme	0.900552	0.890695	151	159	0.89779	0.895179	129	137	0.89779	0.895179	129	137	0.903591	0.8963	110	117	0.89779	0.900785	117	124	0.895628	0.00359794
shuttle	0.999022	0.998903	33	43	0.99964	0.999164	22	32	0.99964	0.999164	22	32	0.999563	0.999687	22	32	0.999563	0.999687	22	32	0.999321	0.000350481
spectf	0.892877	0.896552	106	122	0.892784	0.862069	257	269	0.892784	0.862069	257	269	0.901295	0.913793	237	259	0.892507	0.887931	271	290	0.884483	0.02248
sylvine	0.936214	0.946186	144	159	0.935335	0.950917	69	86	0.935335	0.950917	69	86	0.92863	0.936132	55	69	0.924264	0.936132	73	88	0.944057	0.00748726

## Sheet: autosklearn_summary
dataset	autosklearn_1_cv_acc	autosklearn_1_test_acc	autosklearn_1_completed_trials	autosklearn_1_total_trials	autosklearn_2_cv_acc	autosklearn_2_test_acc	autosklearn_2_completed_trials	autosklearn_2_total_trials	autosklearn_3_cv_acc	autosklearn_3_test_acc	autosklearn_3_completed_trials	autosklearn_3_total_trials	autosklearn_4_cv_acc	autosklearn_4_test_acc	autosklearn_4_completed_trials	autosklearn_4_total_trials	autosklearn_5_cv_acc	autosklearn_5_test_acc	autosklearn_5_completed_trials	autosklearn_5_total_trials	average_test_acc	stdev_test_accuracy
Australian	0.885281	0.850877	741	758	0.883117	0.846491	658	685	0.885281	0.855263	237	247	0.889610	0.846491	411	455	0.891775	0.855263	468	494	0.850877	0.00438596
blood-transfusion-service-center	0.792415	0.785425	787	835	0.796407	0.757085	939	991	0.796407	0.789474	569	605	0.796407	0.773279	499	539	0.792415	0.789474	437	472	0.778947	0.0139073
breast-cancer	0.769634	0.726316	1083	1143	0.769634	0.726316	614	667	0.769634	0.736842	504	530	0.769634	0.726316	682	729	0.774869	0.736842	684	724	0.730526	0.0057655
car	0.994814	0.992995	576	591	0.994814	0.992995	703	704	0.994814	0.992995	308	319	0.993950	0.994746	361	368	0.993950	0.994746	315	326	0.993695	0.000959234
credit-g	0.761194	0.772727	292	313	0.759701	0.745455	359	387	0.770149	0.769697	372	396	0.761194	0.775758	174	186	0.759701	0.766667	331	358	0.766061	0.012007
diabetes	0.776265	0.779528	658	687	0.776265	0.759843	513	553	0.776265	0.787402	326	340	0.774319	0.755906	473	494	0.772374	0.767717	618	651	0.770079	0.0132344
hill-valley	1.000000	0.995	499	573	1.000000	1	291	341	1.000000	1	154	186	1.000000	1	208	245	0.975369	0.9775	315	370	0.9945	0.00974679
jungle_chess_2pcs_raw_endgame_complete	0.874717	0.876682	28	37	0.874717	0.883443	21	29	0.874717	0.880671	15	23	0.874717	0.881009	18	26	0.874717	0.881009	18	26	0.880563	0.00243748
kc1	0.881104	0.840517	409	432	0.880396	0.83908	360	383	0.878273	0.840517	202	211	0.876150	0.836207	270	289	0.876150	0.833333	269	302	0.837931	0.00311487
kr-vs-kp	0.994862	0.997156	256	279	0.993461	0.997156	123	134	0.993461	0.997156	211	226	0.993461	0.997156	137	155	0.993461	0.996209	74	87	0.996967	0.000423899
mfeat-factors	0.979851	0.986364	89	112	0.979851	0.986364	172	202	0.979851	0.986364	57	70	0.979851	0.987879	55	70	0.979851	0.987879	102	120	0.98697	0.000829883
phoneme	0.905525	0.899103	552	555	0.905249	0.900224	200	205	0.906630	0.908072	226	231	0.904144	0.901906	263	264	0.908011	0.90639	205	209	0.903139	0.00391174
shuttle	0.999743	0.78814	62	71	0.999794	0.78814	66	75	0.999743	0.78814	63	69	0.999743	0.999582	58	68	0.999743	0.999687	62	71	0.872738	0.11584
spectf	0.892704	0.887931	599	651	0.888412	0.87069	570	619	0.884120	0.87069	385	425	0.884120	0.887931	334	386	0.888412	0.87931	357	386	0.87931	0.00862069
sylvine	0.947568	0.956239	173	184	0.945820	0.951508	166	183	0.947276	0.954465	130	141	0.955433	0.956239	148	156	0.951355	0.952691	121	135	0.954228	0.00211574
															0.999634

## Sheet: Sheet10
dataset	autosklearn_average_test_acc	tpot_average_test_acc	alphad3m_test_accuracy	lale_pipeline_average_test_acc		autosklearn ratio	tpot_ratio	alphad3m_ratio	lale_pipeline_ratio		auto_sklean_stdev_test_accuracy	lale_pipeline_stdev_test_acc	tpot_stdev_test_acc	alphad3m_stdev_acc		average_lale_pipeline_adaboost_test_acc	stdev_lale_pipeline_adaboost_test_acc	autosklearn_adaboost_average_test_acc	autosklearn_adaboost_stdev_test_acc			autosklearn_adaboost_ratio	lale_pipeline_adaboost_ratio		lale_pipeline_adaboost_ratio_with_autosklearn							autosklearn ratio	tpot_ratio	alphad3m_ratio	lale_pipeline_ratio	lale_pipeline_adaboost_ratio_with_autosklearn	dataset	autosklearn ratio	tpot_ratio	alphad3m_ratio	lale_pipeline_ratio	lale_pipeline_adaboost_ratio_with_autosklearn		dataset	tpot_ratio	alphad3m_ratio	lale_pipeline_ratio	lale_pipeline_adaboost_ratio_with_autosklearn
Australian	0.850877	0.858772	0.868421	0.854386		1	1.00928	1.02062	1.00412		0.00438596	0.00720688	0.0057186	0		0.860526	0.016234	0.847368	0.0310754			1	1.01553		1.01134							1	1.00928	1.02062	1.00412	1.01134	Australian	0	0.927835	2.06186	0.412371	1.13402		Australian	0.927835	2.06186	0.412371	1.13402
blood-transfusion-service-center	0.778947	0.774899	0.747368	0.762753		1	0.994802	0.959459	0.97921		0.0139073	0.0522095	0.0245599	0.00735462		0.77085	0.00735462	0.747368	0.00839532			1	1.03142		0.989605							1	0.994802	0.959459	0.97921	0.989605	blood-transfusion-service-center	0	-0.519751	-4.05405	-2.079	-1.0395		blood-transfusion-service-center	-0.519751	-4.05405	-2.079	-1.0395
breast-cancer	0.730526	0.713684	0.694737	0.711579		1	0.976945	0.951009	0.974063		0.0057655	0.0120018	0.011531	0.0332871		0.709474	0.0205196	0.724211	0.00470751			1	0.979651		0.971182							1	0.976945	0.951009	0.974063	0.971182	breast-cancer	0	-2.30548	-4.89914	-2.59366	-2.88184		breast-cancer	-2.30548	-4.89914	-2.59366	-2.88184
car	0.993695	0.991243	0.927145	0.982487		1	0.997533	0.933028	0.98872		0.000959234	0.0116169	0.00123837	0.00626569		0.982837	0.00259762	0.982487	0.00247673			1	1.00036		0.989073							1	0.997533	0.933028	0.98872	0.989073	car	0	-0.24674	-6.69722	-1.12795	-1.0927		car	-0.24674	-6.69722	-1.12795	-1.0927
credit-g	0.766061	0.741212	0.747879	0.748485		1	0.967563	0.976266	0.977057		0.012007	0.00524864	0.00550482	0.00395103		0.760606	0.0126767	0.762424	0.0101865			1	0.997615		0.99288							1	0.967563	0.976266	0.977057	0.99288	credit-g	0	-3.24367	-2.37342	-2.2943	-0.712025		credit-g	-3.24367	-2.37342	-2.2943	-0.712025
diabetes	0.770079	0.76378	0.77874	0.774803		1	0.99182	1.01125	1.00613		0.0132344	0.0150947	0.0111355	0.00176068		0.759843	0.00482183	0.750394	0.0102665			1	1.01259		0.986708							1	0.99182	1.01125	1.00613	0.986708	diabetes	0	-0.817996	1.12474	0.613497	-1.32924		diabetes	-0.817996	1.12474	0.613497	-1.32924
hill-valley	0.9945	1	0.968	0.9925		1	1.00553	0.973353	0.997989		0.00974679	0.0114564	0	0.00209165		1	0	0.991	0.00518411			1	1.00908		1.00553							1	1.00553	0.973353	0.997989	1.00553	hill-valley	0	0.553042	-2.66466	-0.201106	0.553042		hill-valley	0.553042	-2.66466	-0.201106	0.553042
jungle_chess_2pcs_raw_endgame_complete	0.880563	0.889027	0.741356	0.902914		1	1.00961	0.841912	1.02538		0.00243748	0	0.0204966	0.0201656		0.894057	0.0228725	0.868731	0.00199795			1	1.02915		1.01533							1	1.00961	0.841912	1.02538	1.01533	jungle_chess_2pcs_raw_endgame_complete	0	0.961273	-15.8088	2.53831	1.53251		jungle_chess_2pcs_raw_endgame_complete	0.961273	-15.8088	2.53831	1.53251
kc1	0.837931	0.83477	0.836207	0.83477		1	0.996228	0.997942	0.996228		0.00311487	0.00753455	0.00537594	0.00227175		0.833046	0.00357756	0.84023	0.00311487			1	0.99145		0.99417							1	0.996228	0.997942	0.996228	0.99417	kc1	0	-0.377229	-0.205761	-0.377229	-0.58299		kc1	-0.377229	-0.205761	-0.377229	-0.58299
kr-vs-kp	0.996967	0.994313	0.968341	0.993365		1	0.997338	0.971287	0.996387		0.000423899	0.000670243	1.24127e-16	0.00143751		0.995071	0.00103834	0.994692	0.00158609			1	1.00038		0.998098							1	0.997338	0.971287	0.996387	0.998098	kr-vs-kp	0	-0.26621	-2.87127	-0.361285	-0.19015		kr-vs-kp	-0.26621	-2.87127	-0.361285	-0.19015
mfeat-factors	0.98697	0.971818	0.975455	0.975758		1	0.984648	0.988333	0.98864		0.000829883	0.00283459	0.0049793	0.000677596		0.975152	0.00395103	0.979394	0.000829883			1	0.995668		0.988026							1	0.984648	0.988333	0.98864	0.988026	mfeat-factors	0	-1.53516	-1.16672	-1.13601	-1.19742		mfeat-factors	-1.53516	-1.16672	-1.13601	-1.19742
phoneme	0.903139	0.895628	0.765695	0.890583		1	0.991683	0.847815	0.986097		0.00391174	0.00667252	0.00359794	0		0.901121	0.0044948	0.913565	0.00214914			1	0.986379		0.997766							1	0.991683	0.847815	0.986097	0.997766	phoneme	0	-0.831678	-15.2185	-1.39027	-0.223436		phoneme	-0.831678	-15.2185	-1.39027	-0.223436
shuttle	0.872738	0.999321	0.998851	0.999373		1	1.14504	1.1445	1.1451		0.11584	9.77444e-05	0.000350481	0		0.999791	3.69439e-05	0.999687	8.26091e-05			1	1.0001		1.14558							1	1.14504	1.1445	1.1451	1.14558	shuttle	0	14.5041	14.4503	14.5101	14.558		shuttle	14.5041	14.4503	14.5101	14.558
spectf	0.87931	0.884483	0.836207	0.872414		1	1.00588	0.95098	0.992157		0.00862069	0.01124	0.02248	0.0692344		0.884483	0.0262896	0.896552	0.0292342			1	0.986538		1.00588							1	1.00588	0.95098	0.992157	1.00588	spectf	0	0.588235	-4.90196	-0.784314	0.588235		spectf	0.588235	-4.90196	-0.784314	0.588235
sylvine	0.954228	0.944057	0.913069	0.94997		1	0.989341	0.956867	0.995538		0.00211574	0.00611142	0.00748726	0.00118273		0.951508	0.00200542	0.95068	0.00136143			1	1.00087		0.997149							1	0.989341	0.956867	0.995538	0.997149	sylvine	0	-1.06594	-4.31334	-0.446207	-0.285077		sylvine	-1.06594	-4.31334	-0.446207	-0.285077
							1.00422	0.968308	1.00352														1.00245										1.00422	0.968308	1.00352

[truncated: 3 more sheets: Sheet13, autosklearn_adaboost, lale_pipeline_adaboost]
