# Supplementary material
Source: ML conference proceedings conference paper supplement (https://openreview.net/forum?id=uFORMPcA_b)
Supplement: supplementary_material [file attachment]

# LALÉ: Library for Semi-Automated Data Science

—

April 2021 user study

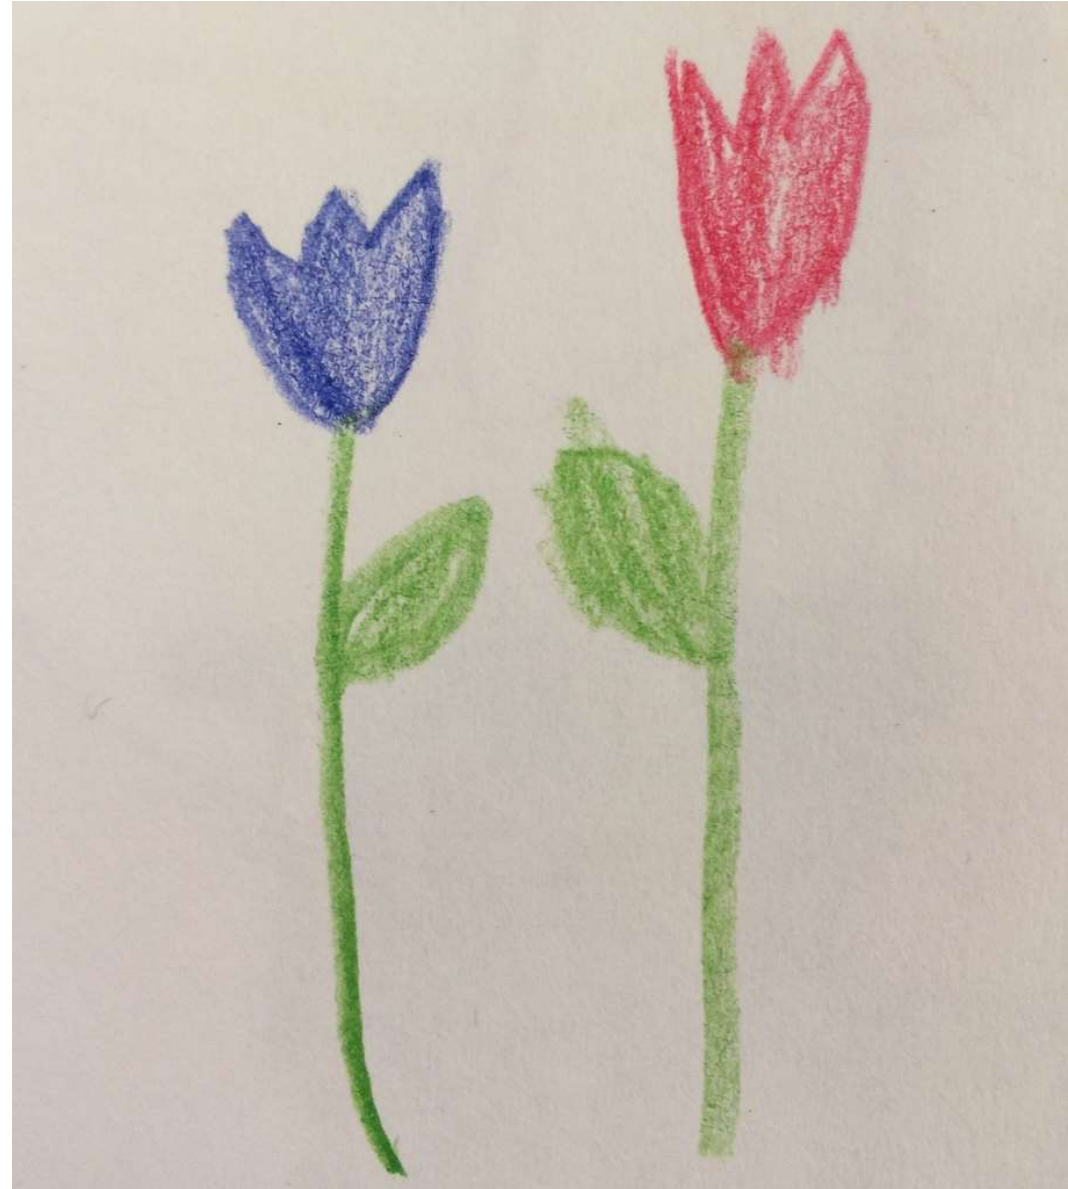

# Manual Machine Learning

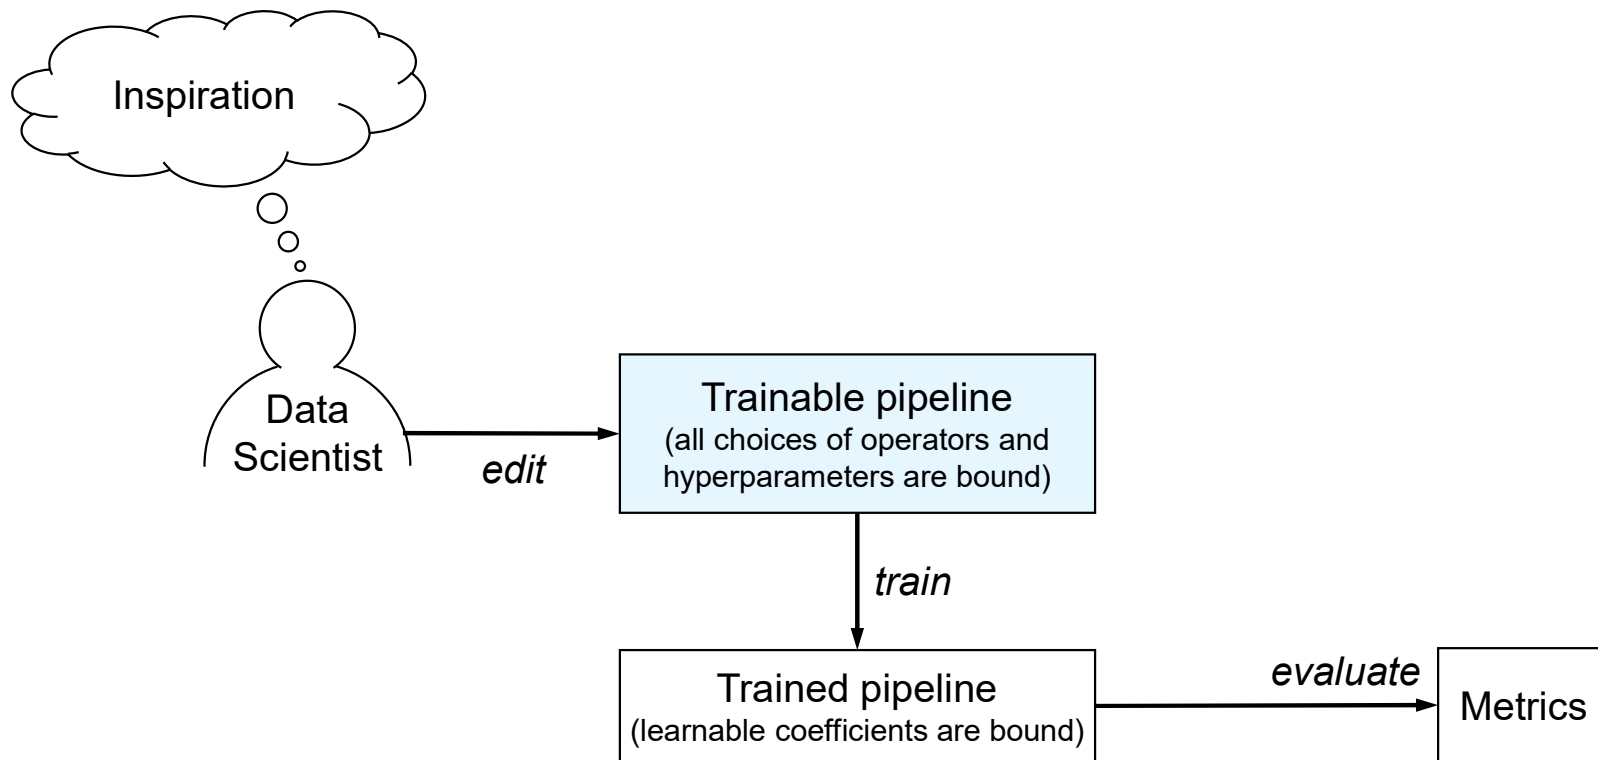

# Manual Machine Learning

```
prep_n = Project(columns={'type': 'number'}) >> StandardScaler()  
prep_s = Project(columns={'type': 'string'}) >> OneHotEncoder()  
logistic_regression = LogisticRegression(max_iter=1000)  
trainable = (prep_n & prep_s) >> ConcatFeatures >> logistic_regression
```

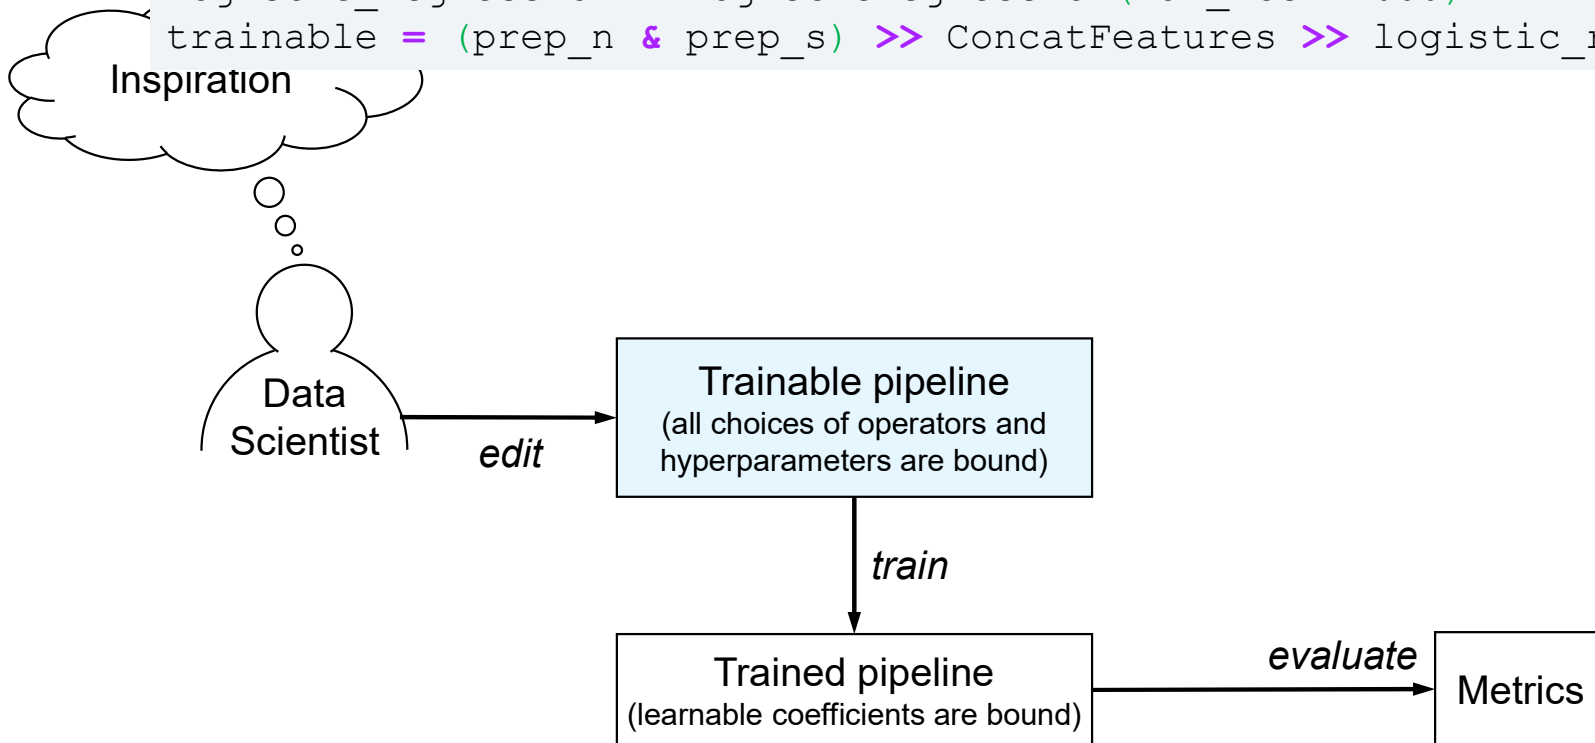

# Iterated Manual Machine Learning

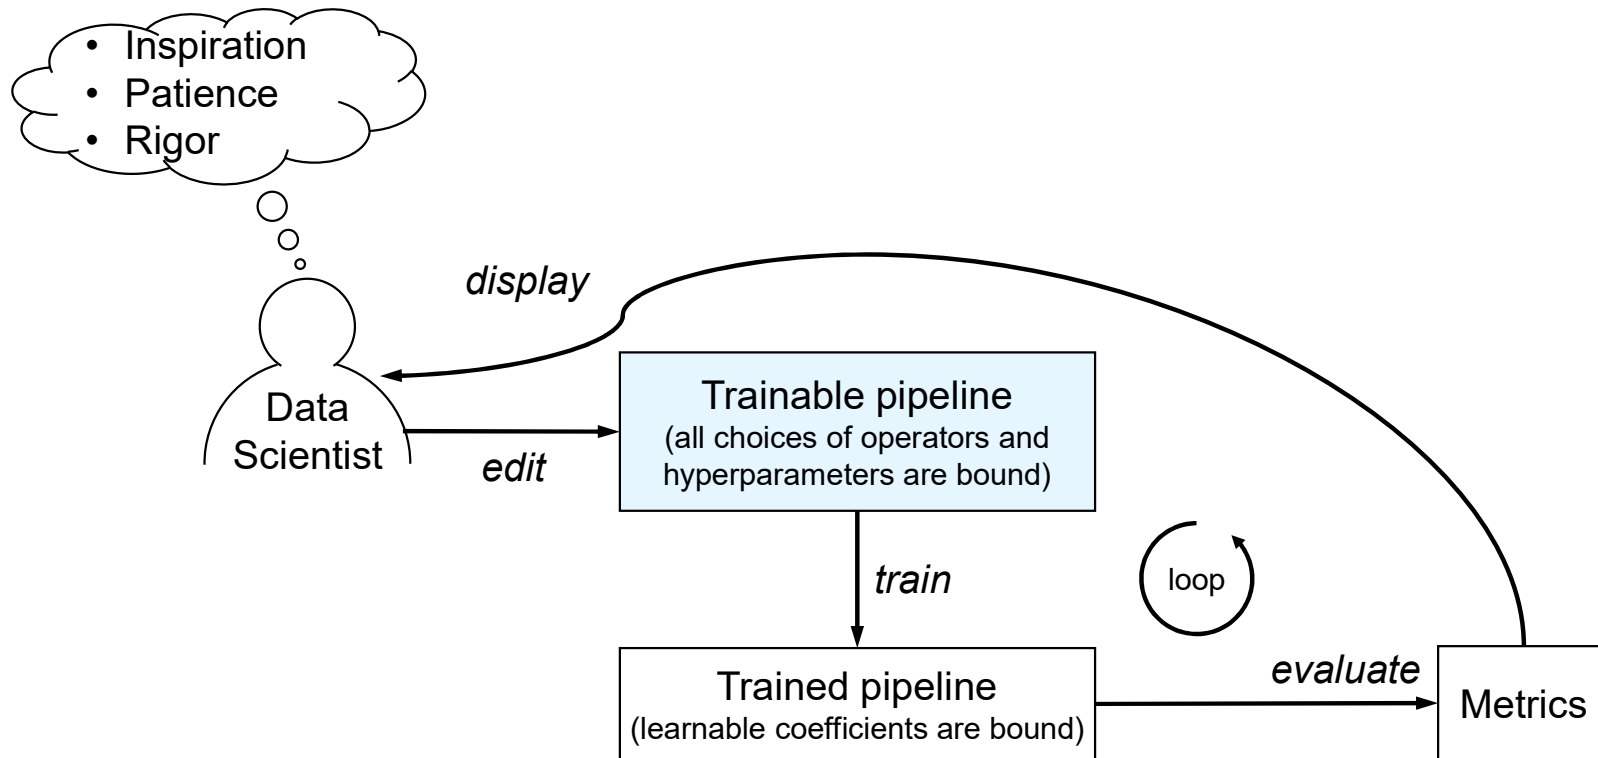

# Iterated Manual Machine Learning

```
trained = trainable.fit(train_X, train_y)
accuracy_score(test_y, trained.predict(test_X))
```



# AutoML: Automated Machine Learning

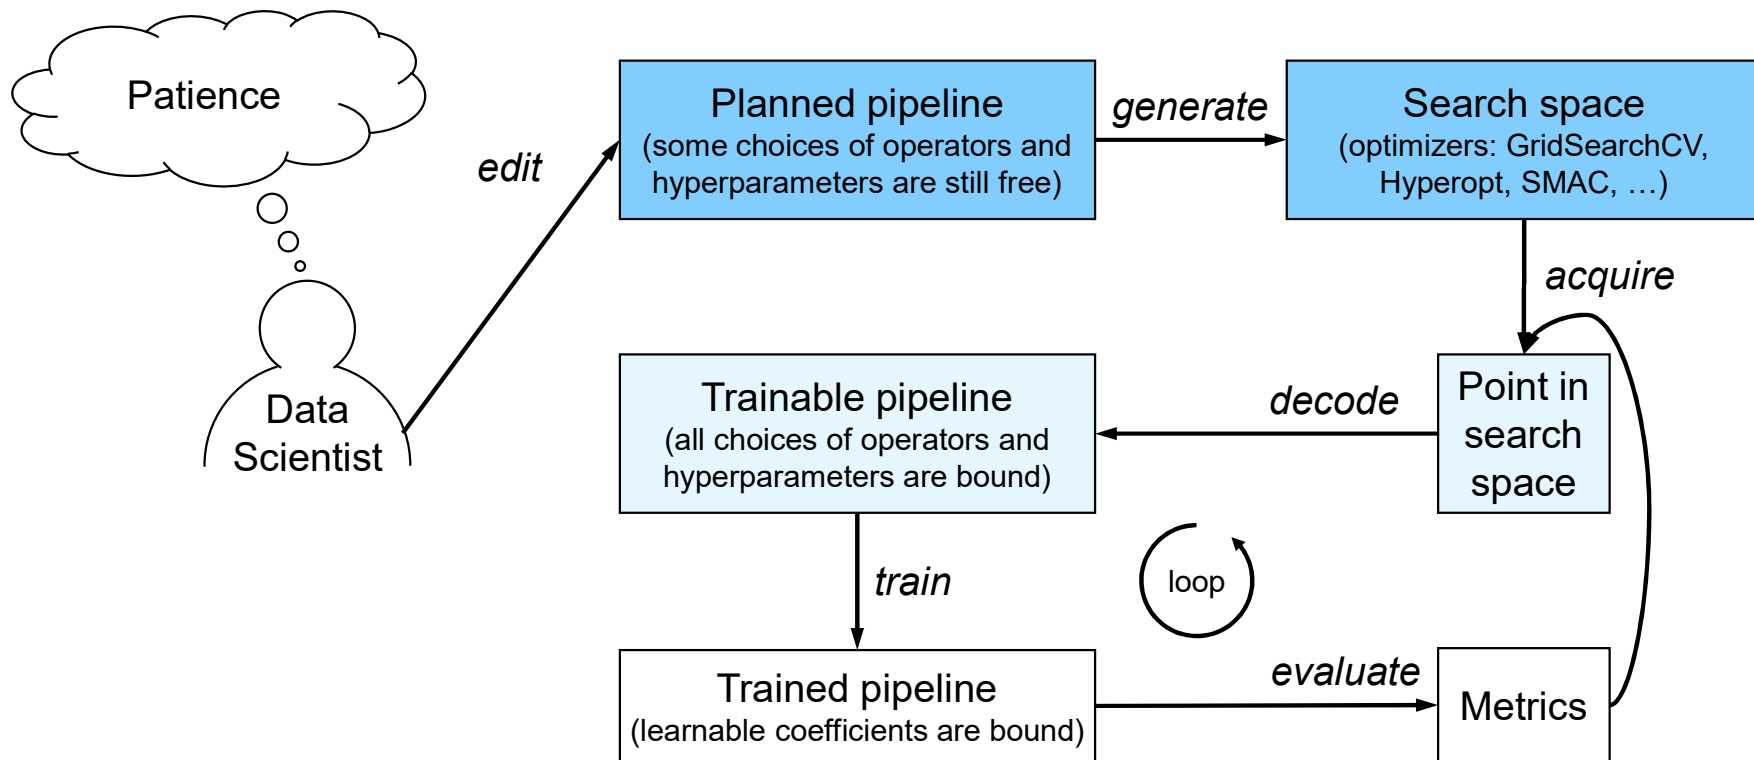

# AutoML: Automated Machine Learning

```
clf = LogisticRegression | DecisionTreeClassifier | KNeighborsClassifier
planned = (prep_n & prep_s) >> ConcatFeatures >> clf
trained = planned.auto_configure(train_X, train_y, optimizer=Hyperopt)
```

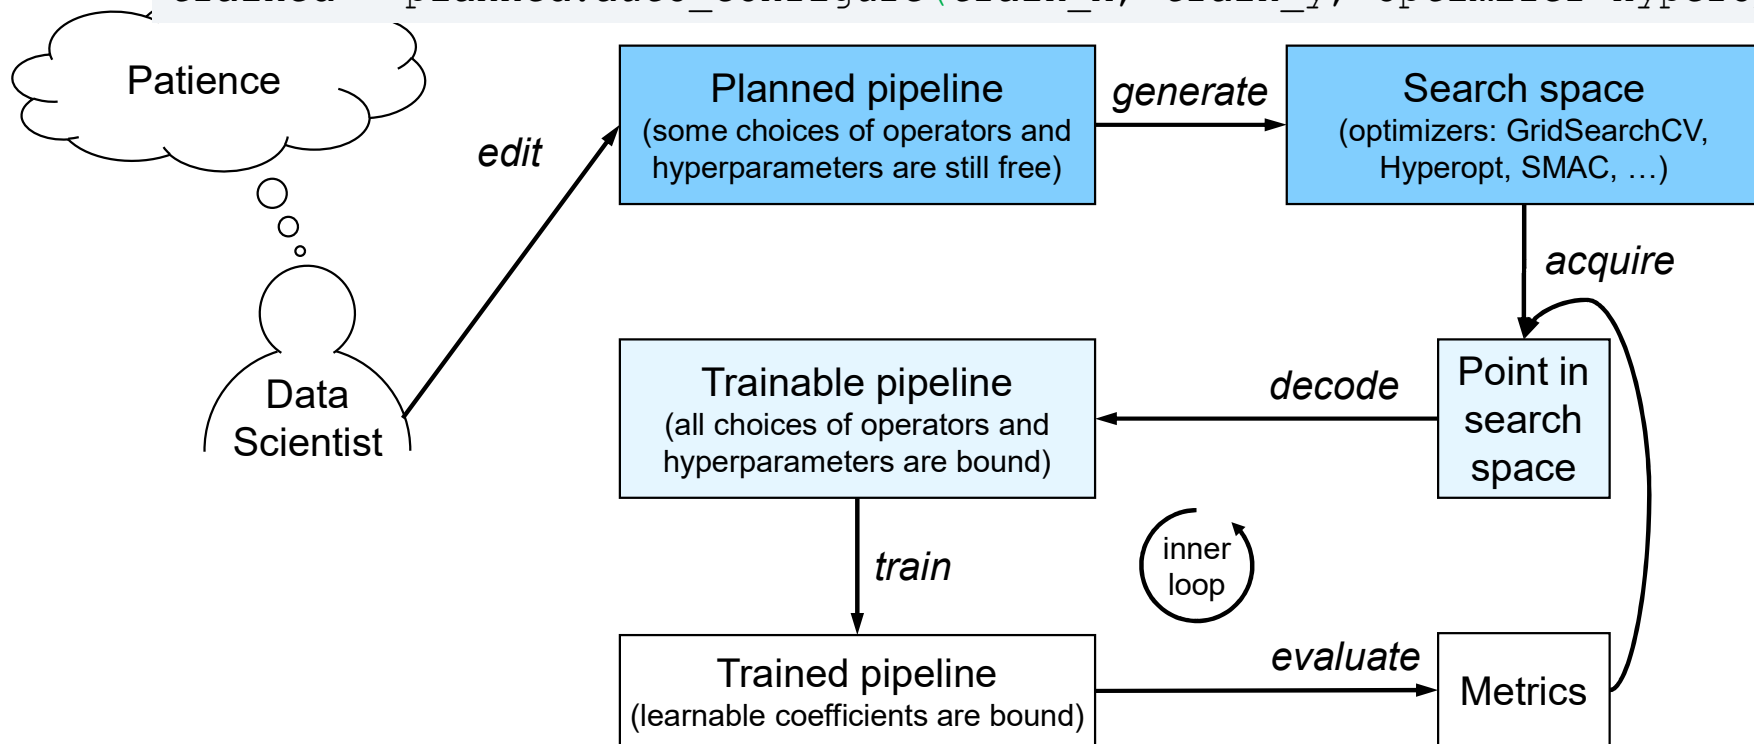

# Iterated AutoML

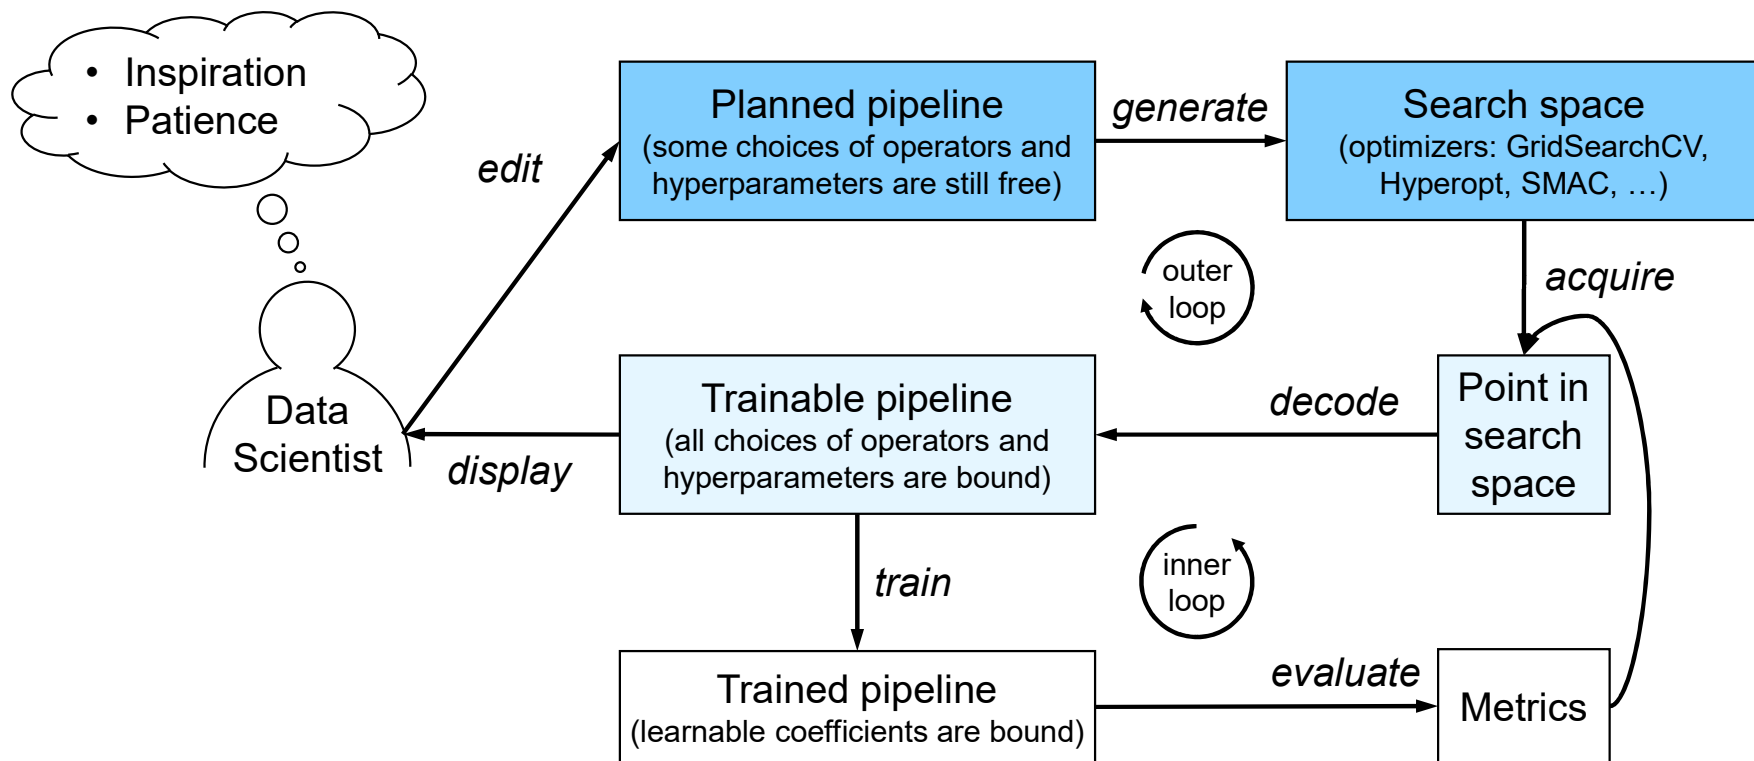



# Iterated AutoML

```
pipeline.visualize()  
pipeline.pretty_print(ipython_display=True)  
Grove = XGBClassifier.customize_schema(n_estimators=schemas.Int(min=2, max=8))
```

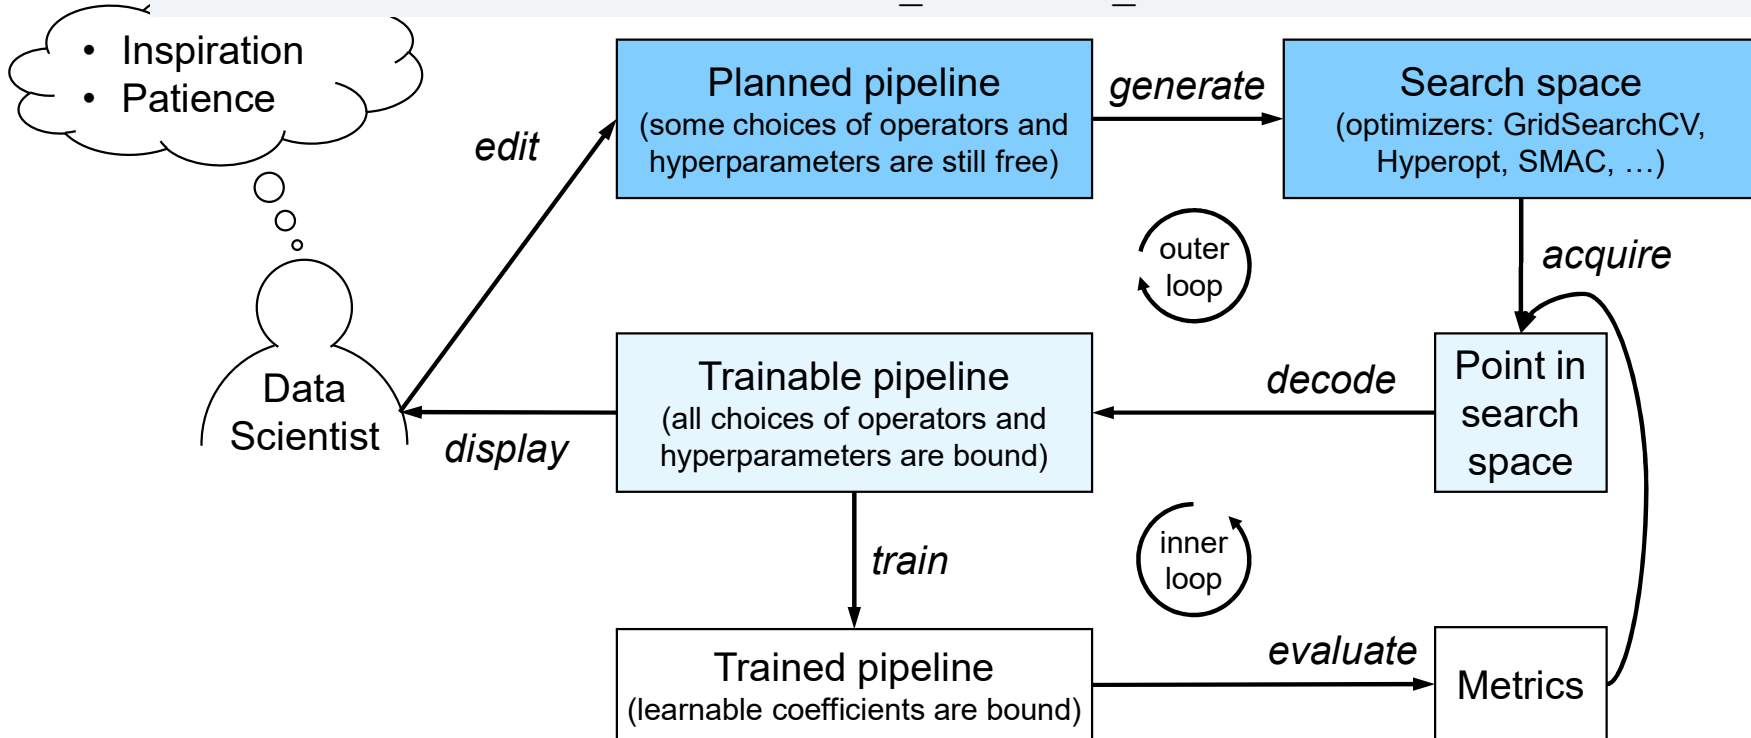

# LALE at a Glance

|                      | API                                                        | Description                   |
|----------------------|------------------------------------------------------------|-------------------------------|
| manual ML            | <code>op2 = op1(hyperparams)</code>                        | initialize and make trainable |
|                      | <code>op3 = op2.fit(train_X, train_y)</code>               | train                         |
|                      | <code>y_pred = op3.predict(test_X)</code>                  | predict                       |
| pipeline combinators | <code>op3 = op1 &gt;&gt; op2</code>                        | pipe (add dataflow edge)      |
|                      | <code>op3 = (op1 &amp; op2) &gt;&gt; ConcatFeatures</code> | union (separate transforms)   |
|                      | <code>op3 = op1   op2    # often with   NoOp</code>        | choice (AutoML picks one)     |
| semi-automated ML    | <code>op3 = op1.auto_configure(X, y, optimizer)</code>     | run AutoML                    |
|                      | <code>op.visualize()</code>                                | display graphically           |
|                      | <code>op.pretty_print()</code>                             | display as Python code        |

See also LALE's online documentation for the hyperparameter schemas of over 180 operators (from scikit-learn, imblearn, AIF360, Snap ML, ...), e.g.:

```
from lale.lib.lale import ConcatFeatures, NoOp, Hyperopt
```
